# Supplementary material for: A series of coordination polymers based on flexible 5-carboxy-1-(4′-carboxybenzyl)-2-oxidopyridinium and structurally related N-donor ligands: syntheses, structures and photoluminescent properties
Source: Royal Society of Chemistry journal article supplement (doi:10.1039/c2ce25439e), 2012-01-01
Supplement: c2ce25439e.pdf [file c2ce25439e.pdf]

Supplementary Material (ESI) for CrystEngComm

**A series of coordination polymers based on flexible 5-carboxy-1-(4'-carboxybenzyl)-2-oxidopyridinium and structurally related N-donor ligands: syntheses, structures and photoluminescent properties**

**Yun-Xue Zhang, Jin Yang,\* Wei-Qiu Kan, and Jian-Fang Ma\***

*Key Lab of Polyoxometalate Science, Department of Chemistry, Northeast Normal University, Changchun 130024, People's Republic of China*

\* Correspondence authors

E-mail: yangjinnenu@yahoo.com.cn (J. Yang)

E-mail: jianfangma@yahoo.com.cn (J.-F. Ma)

Fax: +86-431-85098620 (J.-F. Ma)

**Table S1.** Selected bond distances (Å) and angles (°) for **1**.

|                                              |            |                               |            |
|----------------------------------------------|------------|-------------------------------|------------|
| Zn(1)-O(5)                                   | 1.976(3)   | Zn(1)-O(1) <sup>#1</sup>      | 1.978(3)   |
| Zn(1)-N(2)                                   | 2.009(3)   | Zn(1)-N(5) <sup>#2</sup>      | 2.020(3)   |
| O(5)-Zn(1)-O(1) <sup>#1</sup>                | 104.35(13) | O(5)-Zn(1)-N(2)               | 109.67(14) |
| O(1) <sup>#1</sup> -Zn(1)-N(2)               | 101.70(13) | O(5)-Zn(1)-N(5) <sup>#2</sup> | 124.62(14) |
| O(1) <sup>#1</sup> -Zn(1)-N(5) <sup>#2</sup> | 108.25(14) | N(2)-Zn(1)-N(5) <sup>#2</sup> | 105.96(15) |

Symmetry transformations used to generate equivalent atoms: <sup>#1</sup> x-1/2, y+1/2, z; <sup>#2</sup> -x+5/2, y+1/2, -z+1/2.

**Table S2.** Selected bond distances (Å) and angles (°) for **2**.

|                                              |            |                                              |            |
|----------------------------------------------|------------|----------------------------------------------|------------|
| Co(1)-O(5)                                   | 2.008(2)   | Co(1)-N(2)                                   | 2.030(16)  |
| Co(1)-O(1) <sup>#1</sup>                     | 2.0314(19) | Co(1)-O(2) <sup>#2</sup>                     | 2.0595(19) |
| Co(1)-O(4) <sup>#3</sup>                     | 2.076(2)   |                                              |            |
| O(5)-Co(1)-N(2)                              | 102.9(5)   | O(5)-Co(1)-O(1) <sup>#1</sup>                | 91.64(9)   |
| N(2)-Co(1)-O(1) <sup>#1</sup>                | 103.5(7)   | O(1) <sup>#1</sup> -Co(1)-O(4) <sup>#3</sup> | 87.74(8)   |
| O(5)-Co(1)-O(2) <sup>#2</sup>                | 87.78(9)   | N(2)-Co(1)-O(2) <sup>#2</sup>                | 94.5(7)    |
| O(1) <sup>#1</sup> -Co(1)-O(2) <sup>#2</sup> | 161.63(8)  | O(2) <sup>#2</sup> -Co(1)-O(4) <sup>#3</sup> | 87.29(8)   |
| O(5)-Co(1)-O(4) <sup>#3</sup>                | 162.29(8)  | N(2)-Co(1)-O(4) <sup>#3</sup>                | 94.4(5)    |

Symmetry transformations used to generate equivalent atoms: <sup>#1</sup> x, -y, z+1/2; <sup>#2</sup> -x, y+1, -z+1/2; <sup>#3</sup> -x, -y+1, -z+1.

**Table S3a.** Selected bond distances (Å) and angles (°) for **3**.

|                                |          |                                |          |
|--------------------------------|----------|--------------------------------|----------|
| Zn(1)-O(4)                     | 1.965(5) | Zn(1)-O(1) <sup>#1</sup>       | 2.004(5) |
| Zn(1)-N(3)                     | 2.073(5) | Zn(1)-N(4)                     | 2.158(6) |
| Zn(1)-N(2)                     | 2.178(6) |                                |          |
| O(4)-Zn(1)-O(1) <sup>#1</sup>  | 92.9(3)  | O(4)-Zn(1)-N(3)                | 124.7(2) |
| O(1) <sup>#1</sup> -Zn(1)-N(3) | 142.4(2) | O(4)-Zn(1)-N(4)                | 103.0(2) |
| O(1) <sup>#1</sup> -Zn(1)-N(4) | 98.0(2)  | N(3)-Zn(1)-N(4)                | 75.2(2)  |
| O(4)-Zn(1)-N(2)                | 96.4(2)  | O(1) <sup>#1</sup> -Zn(1)-N(2) | 103.0(2) |

|                 |         |                 |          |
|-----------------|---------|-----------------|----------|
| N(3)-Zn(1)-N(2) | 75.6(2) | N(4)-Zn(1)-N(2) | 150.5(2) |
|-----------------|---------|-----------------|----------|

**Table S3b.** Hydrogen bonds for **3** (Å and °).

| D-H...A                          | d(D-H) | d(H...A) | d(D...A)  | <(DHA) |
|----------------------------------|--------|----------|-----------|--------|
| O(1W)-H(1B)...O(5)               | 0.92   | 1.74     | 2.640(9)  | 166(3) |
| O(1W)-H(1A)...O(3) <sup>#3</sup> | 0.97   | 1.85     | 2.793(10) | 165(4) |

Symmetry transformations used to generate equivalent atoms: <sup>#1</sup> x-1/2, -y+1/2, z-1/2;  
<sup>#2</sup> x+1/2, -y+1/2, z+1/2; <sup>#3</sup> -x+1, -y, -z+1.

**Table S4.** Selected bond distances (Å) and angles (°) for **4**.

|                                |            |                                |            |
|--------------------------------|------------|--------------------------------|------------|
| Co(1)-O(1) <sup>#1</sup>       | 2.002(3)   | Co(1)-N(3)                     | 2.074(3)   |
| Co(1)-O(5)                     | 2.098(3)   | Co(1)-N(2)                     | 2.148(4)   |
| Co(1)-N(4)                     | 2.153(3)   | Co(1)-O(4)                     | 2.252(3)   |
| O(1) <sup>#1</sup> -Co(1)-N(3) | 98.62(13)  | O(1) <sup>#1</sup> -Co(1)-O(5) | 92.87(13)  |
| N(3)-Co(1)-O(5)                | 167.54(14) | O(1) <sup>#1</sup> -Co(1)-N(2) | 105.93(14) |
| N(3)-Co(1)-N(2)                | 75.29(14)  | O(5)-Co(1)-N(2)                | 96.98(11)  |
| O(1) <sup>#1</sup> -Co(1)-N(4) | 89.82(13)  | N(3)-Co(1)-N(4)                | 74.62(13)  |
| O(5)-Co(1)-N(4)                | 110.40(13) | N(2)-Co(1)-N(4)                | 147.76(14) |
| O(1) <sup>#1</sup> -Co(1)-O(4) | 149.17(11) | N(3)-Co(1)-O(4)                | 110.12(13) |
| O(5)-Co(1)-O(4)                | 59.78(12)  | N(2)-Co(1)-O(4)                | 92.30(14)  |
| N(4)-Co(1)-O(4)                | 87.33(13)  |                                |            |

Symmetry transformation used to generate equivalent atoms: <sup>#1</sup> x-1/2, -y+3/2, z+1/2.

**Table S5.** Selected bond distances (Å) and angles (°) for **5**.

|                                |            |                          |           |
|--------------------------------|------------|--------------------------|-----------|
| Cd(1)-O(5)                     | 2.2439(19) | Cd(1)-O(2) <sup>#1</sup> | 2.295(2)  |
| Cd(1)-N(2)                     | 2.308(3)   | Cd(1)-N(3)               | 2.335(2)  |
| Cd(1)-O(1W)                    | 2.344(2)   | Cd(1)-O(1) <sup>#1</sup> | 2.415(2)  |
| O(5)-Cd(1)-O(2) <sup>#1</sup>  | 97.30(8)   | O(5)-Cd(1)-N(2)          | 99.02(8)  |
| O(2) <sup>#1</sup> -Cd(1)-N(2) | 163.37(9)  | O(5)-Cd(1)-N(3)          | 171.49(9) |

|                                |           |                                              |          |
|--------------------------------|-----------|----------------------------------------------|----------|
| O(2) <sup>#1</sup> -Cd(1)-N(3) | 91.21(9)  | N(2)-Cd(1)-N(3)                              | 72.48(9) |
| O(5)-Cd(1)-O(1W)               | 90.64(8)  | O(2) <sup>#1</sup> -Cd(1)-O(1W)              | 89.59(8) |
| N(2)-Cd(1)-O(1W)               | 93.41(8)  | N(3)-Cd(1)-O(1W)                             | 89.56(8) |
| O(5)-Cd(1)-O(1) <sup>#1</sup>  | 96.36(8)  | O(2) <sup>#1</sup> -Cd(1)-O(1) <sup>#1</sup> | 55.57(8) |
| N(2)-Cd(1)-O(1) <sup>#1</sup>  | 119.01(9) | N(3)-Cd(1)-O(1) <sup>#1</sup>                | 88.31(8) |
| O(1W)-Cd(1)-O(1) <sup>#1</sup> | 145.02(8) |                                              |          |

Symmetry transformation used to generate equivalent atoms: <sup>#1</sup>-x+1, -y+1, -z+1; <sup>#2</sup>x+1, y, z; <sup>#3</sup>-x+1, -y+1, -z+2;

**Table S6a.** Selected bond distances (Å) and angles (°) for **6**.

|                                 |            |                                              |           |
|---------------------------------|------------|----------------------------------------------|-----------|
| Cd(1)-O(6)                      | 2.247(4)   | Cd(1)-O(6) <sup>#1</sup>                     | 2.247(4)  |
| Cd(1)-O(1)                      | 2.313(5)   | Cd(1)-O(1) <sup>#1</sup>                     | 2.313(5)  |
| Cd(1)-O(5) <sup>#2</sup>        | 2.323(6)   | Cd(1)-O(5) <sup>#3</sup>                     | 2.323(6)  |
| Cd(2)-O(4) <sup>#2</sup>        | 2.253(6)   | Cd(2)-O(6)                                   | 2.292(5)  |
| Cd(2)-O(6) <sup>#4</sup>        | 2.297(5)   | Cd(2)-N(2)                                   | 2.334(6)  |
| Cd(2)-O(2)                      | 2.342(5)   | Cd(2)-O(1W)                                  | 2.382(6)  |
| O(6)-Cd(1)-O(1)                 | 98.30(17)  | O(6) <sup>#1</sup> -Cd(1)-O(1)               | 81.70(17) |
| O(6)-Cd(1)-O(1) <sup>#1</sup>   | 81.70(17)  | O(6) <sup>#1</sup> -Cd(1)-O(1) <sup>#1</sup> | 98.30(17) |
| O(6)-Cd(1)-O(5) <sup>#2</sup>   | 91.06(19)  | O(6) <sup>#1</sup> -Cd(1)-O(5) <sup>#2</sup> | 88.94(19) |
| O(1)-Cd(1)-O(5) <sup>#2</sup>   | 89.9(2)    | O(1) <sup>#1</sup> -Cd(1)-O(5) <sup>#2</sup> | 90.1(2)   |
| O(6)-Cd(1)-O(5) <sup>#3</sup>   | 88.94(19)  | O(6) <sup>#1</sup> -Cd(1)-O(5) <sup>#3</sup> | 91.06(19) |
| O(1)-Cd(1)-O(5) <sup>#3</sup>   | 90.1(2)    | O(1) <sup>#1</sup> -Cd(1)-O(5) <sup>#3</sup> | 89.9(2)   |
| O(4) <sup>#2</sup> -Cd(2)-O(6)  | 102.17(18) | O(4) <sup>#2</sup> -Cd(2)-O(6) <sup>#4</sup> | 171.6(2)  |
| O(6)-Cd(2)-O(6) <sup>#4</sup>   | 84.05(16)  | O(4) <sup>#2</sup> -Cd(2)-N(2)               | 82.2(2)   |
| O(6)-Cd(2)-N(2)                 | 171.7(2)   | O(6) <sup>#4</sup> -Cd(2)-N(2)               | 92.3(2)   |
| O(4) <sup>#2</sup> -Cd(2)-O(2)  | 102.2(2)   | O(6)-Cd(2)-O(2)                              | 85.16(19) |
| O(6) <sup>#4</sup> -Cd(2)-O(2)  | 83.82(19)  | N(2)-Cd(2)-O(2)                              | 87.0(2)   |
| O(4) <sup>#2</sup> -Cd(2)-O(1W) | 87.6(2)    | O(6)-Cd(2)-O(1W)                             | 81.40(19) |
| O(6) <sup>#4</sup> -Cd(2)-O(1W) | 87.73(19)  | N(2)-Cd(2)-O(1W)                             | 106.0(2)  |

|                  |          |
|------------------|----------|
| O(2)-Cd(2)-O(1W) | 164.8(2) |
|------------------|----------|

**Table S6b.** Hydrogen bonds for **6** (Å and °).

| D-H···A                          | d(D-H)    | d(H···A) | d(D···A) | <(DHA)  |
|----------------------------------|-----------|----------|----------|---------|
| O(1W)-H(1A)···O(2) <sup>#4</sup> | 0.84(9)   | 1.97(10) | 2.807(8) | 172(10) |
| O(1W)-H(1B)···O(3) <sup>#5</sup> | 0.897(10) | 1.81(2)  | 2.690(8) | 167(8)  |

Symmetry transformation used to generate equivalent atoms: <sup>#1</sup> -x, -y, -z+1; <sup>#2</sup> x-1/2, -y, z-1/2; <sup>#3</sup> -x+1/2, y, -z+3/2; <sup>#4</sup> -x, -y+1, -z+1; <sup>#5</sup> x+1/2, -y, z-1/2.

**Table S7.** Selected bond distances (Å) and angles (°) for **7**.

|                                              |          |                                              |          |
|----------------------------------------------|----------|----------------------------------------------|----------|
| Pb(1)-O(4)                                   | 2.350(6) | Pb(1)-O(1) <sup>#1</sup>                     | 2.352(6) |
| Pb(1)-O(2) <sup>#2</sup>                     | 2.422(6) | Pb(1)-O(1W)                                  | 2.52(2)  |
| Pb(1)-O(3) <sup>#3</sup>                     | 2.748(7) |                                              |          |
| O(4)-Pb(1)-O(1) <sup>#1</sup>                | 77.9(2)  | O(4)-Pb(1)-O(2) <sup>#2</sup>                | 76.1(2)  |
| O(1) <sup>#1</sup> -Pb(1)-O(2) <sup>#2</sup> | 95.6(2)  | O(4)-Pb(1)-O(1W)                             | 78.5(4)  |
| O(1) <sup>#1</sup> -Pb(1)-O(1W)              | 92.2(4)  | O(2) <sup>#2</sup> -Pb(1)-O(1W)              | 151.1(4) |
| O(4)-Pb(1)-O(3) <sup>#3</sup>                | 145.3(2) | O(1) <sup>#1</sup> -Pb(1)-O(3) <sup>#3</sup> | 84.6(2)  |
| O(2) <sup>#2</sup> -Pb(1)-O(3) <sup>#3</sup> | 76.1(2)  | O(1W)-Pb(1)-O(3) <sup>#3</sup>               | 132.4(4) |

Symmetry transformation used to generate equivalent atoms: <sup>#1</sup> -x+3/2, y+1/2, -z+1/2; <sup>#2</sup> -x+1/2, y+1/2, -z+1/2; <sup>#3</sup> x+1, y+1, z.

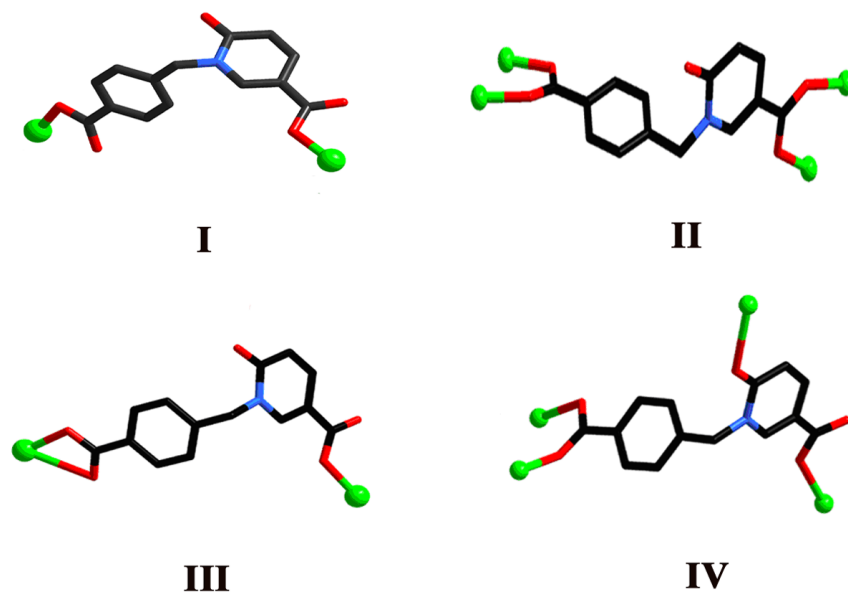

Scheme S1 Coordination modes of the H<sub>2</sub>L ligand.

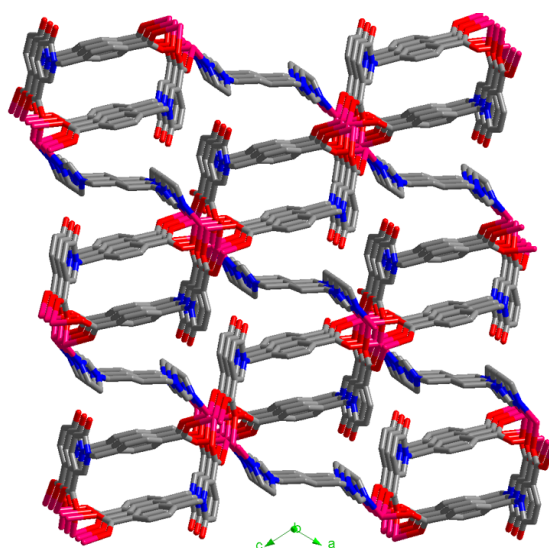

Fig. S1 View of the 3D framework constructed by the L anions and biim-4 ligands.

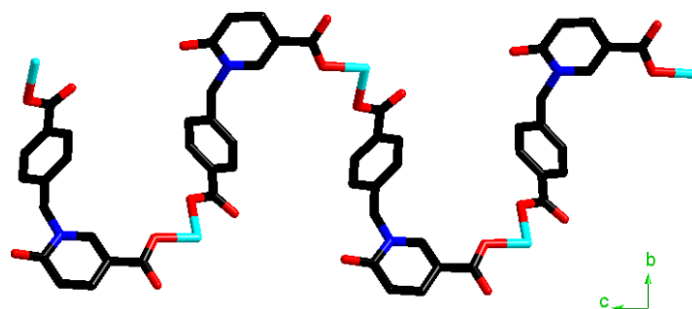

Fig. S2 The 1D infinite chain constructed by L anions and Zn(II) ions.

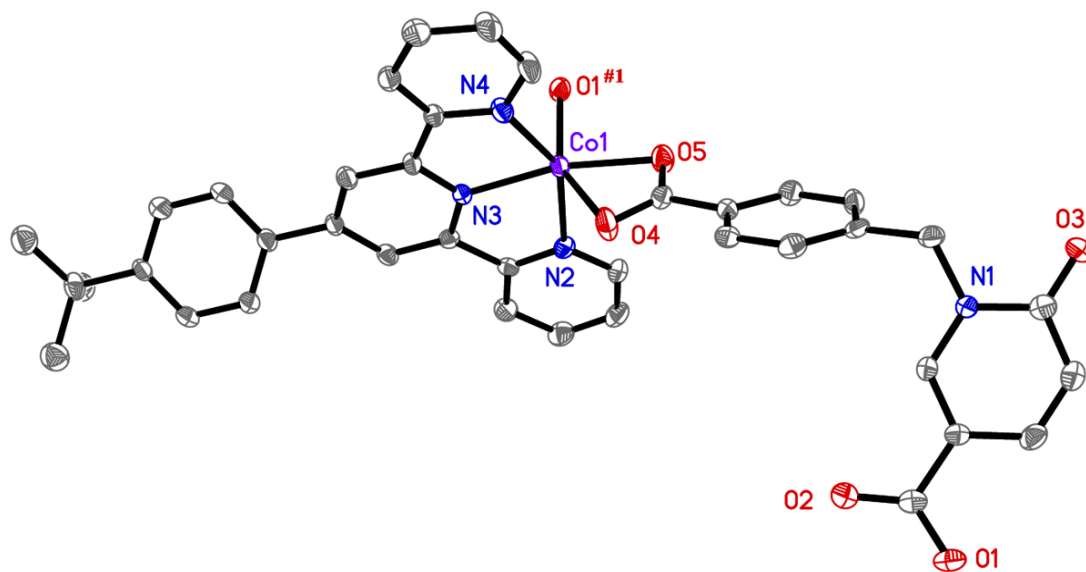

(a)

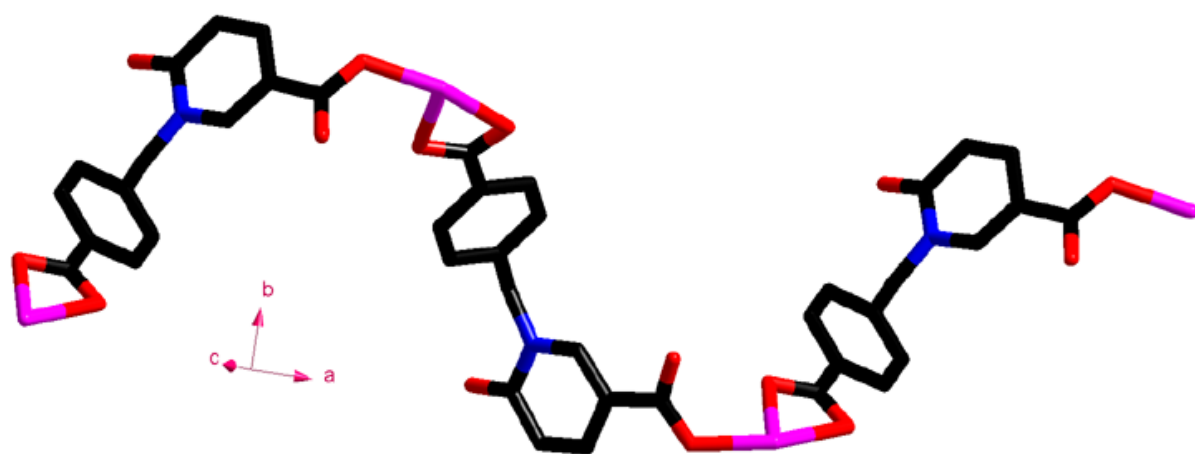

(b)

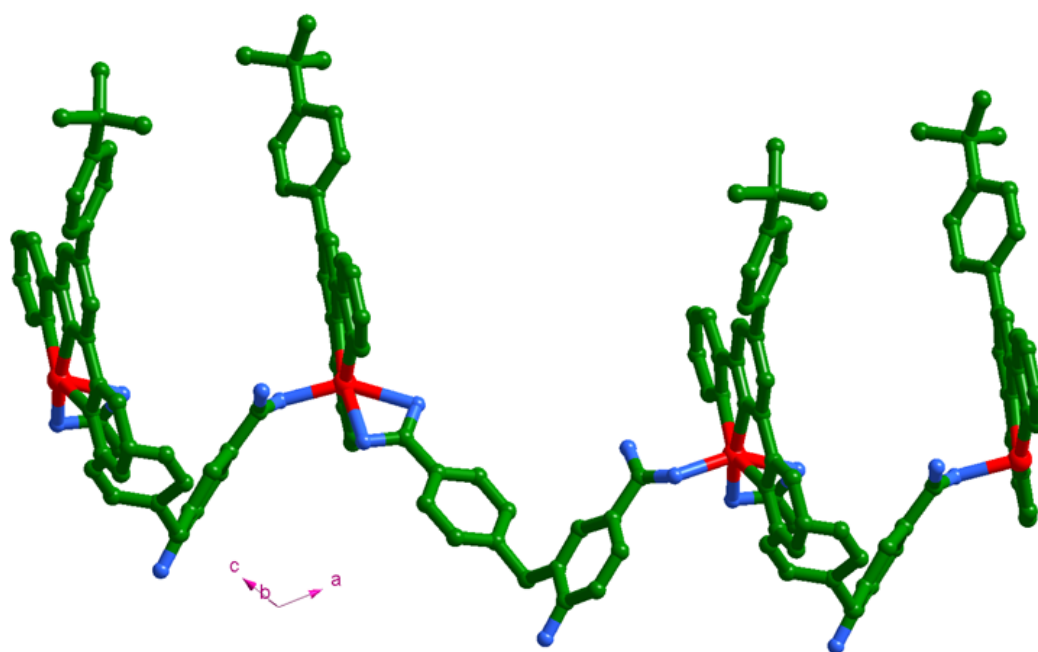

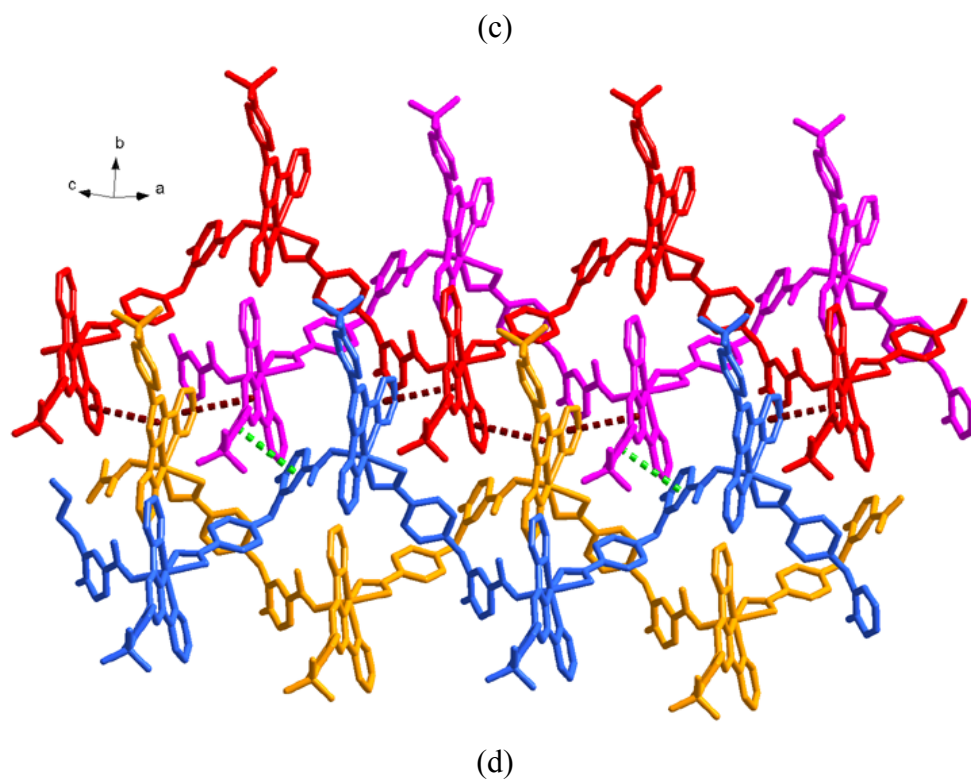

**Fig. S3** (a) Coordination environment of the Co(II) ion in **4** (30% probability displacement ellipsoids). Symmetry code: <sup>#1</sup>  $x-1/2, -y+3/2, z+1/2$ . (b) The 1D infinite chain constructed by L anions and Co(II) ions. (c) View of the 1D chain of compound **4**. (d) View of the 2D supramolecular layer formed by  $\pi$ - $\pi$  interactions in **4**.



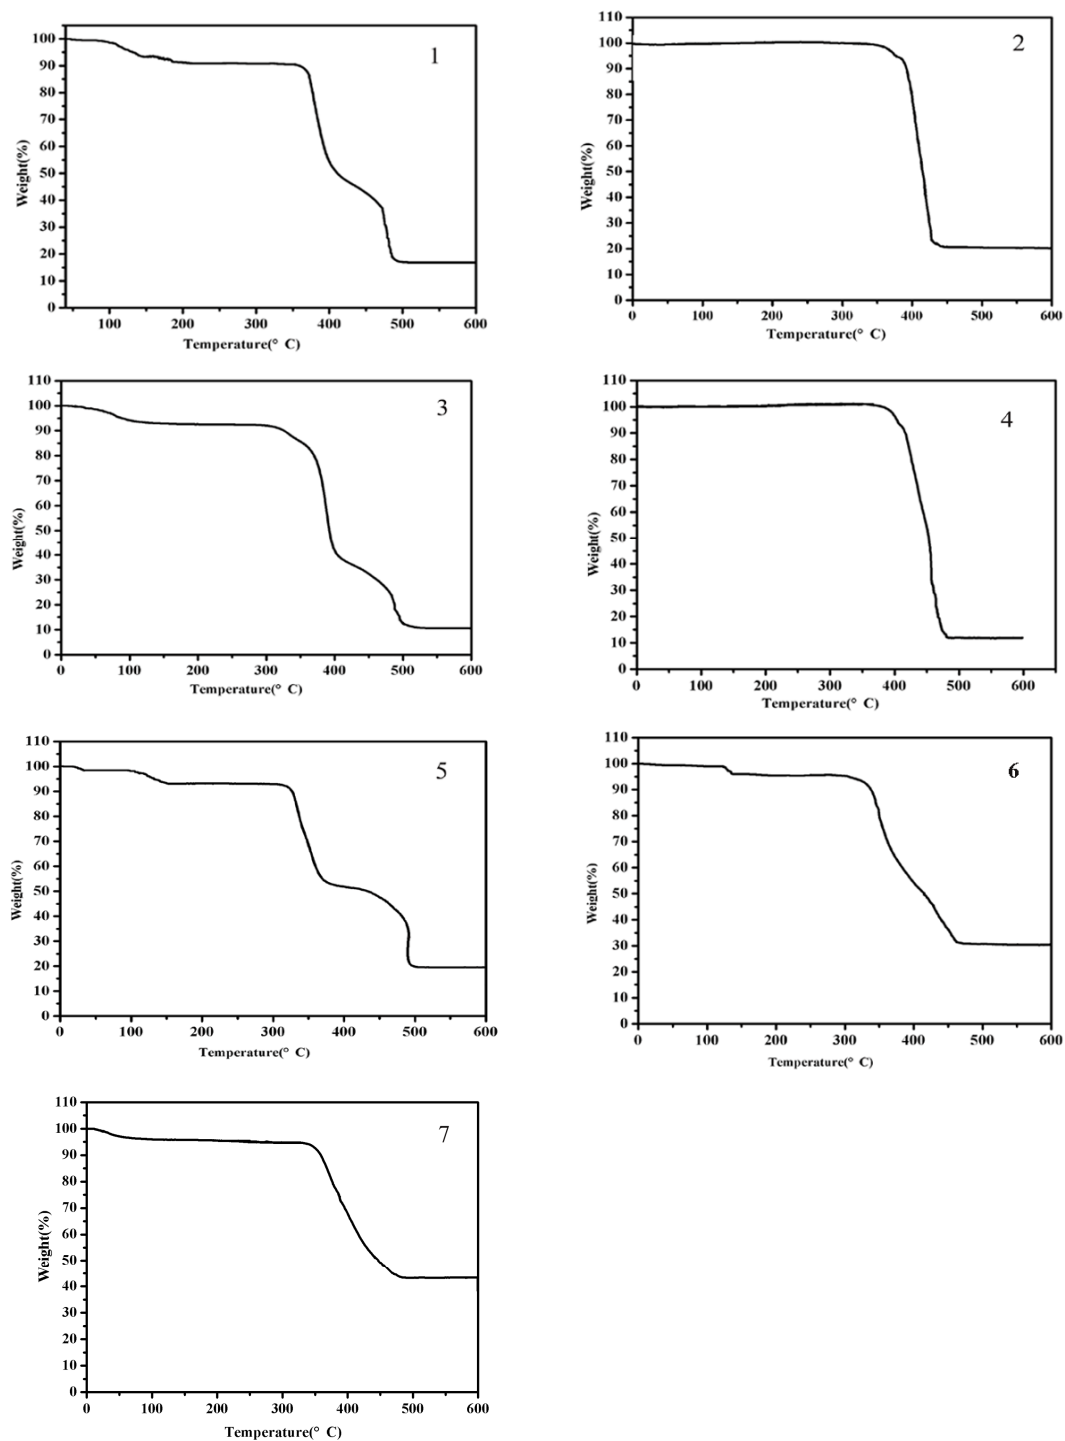

**Fig. S4** The TGA curves of compounds 1–7.

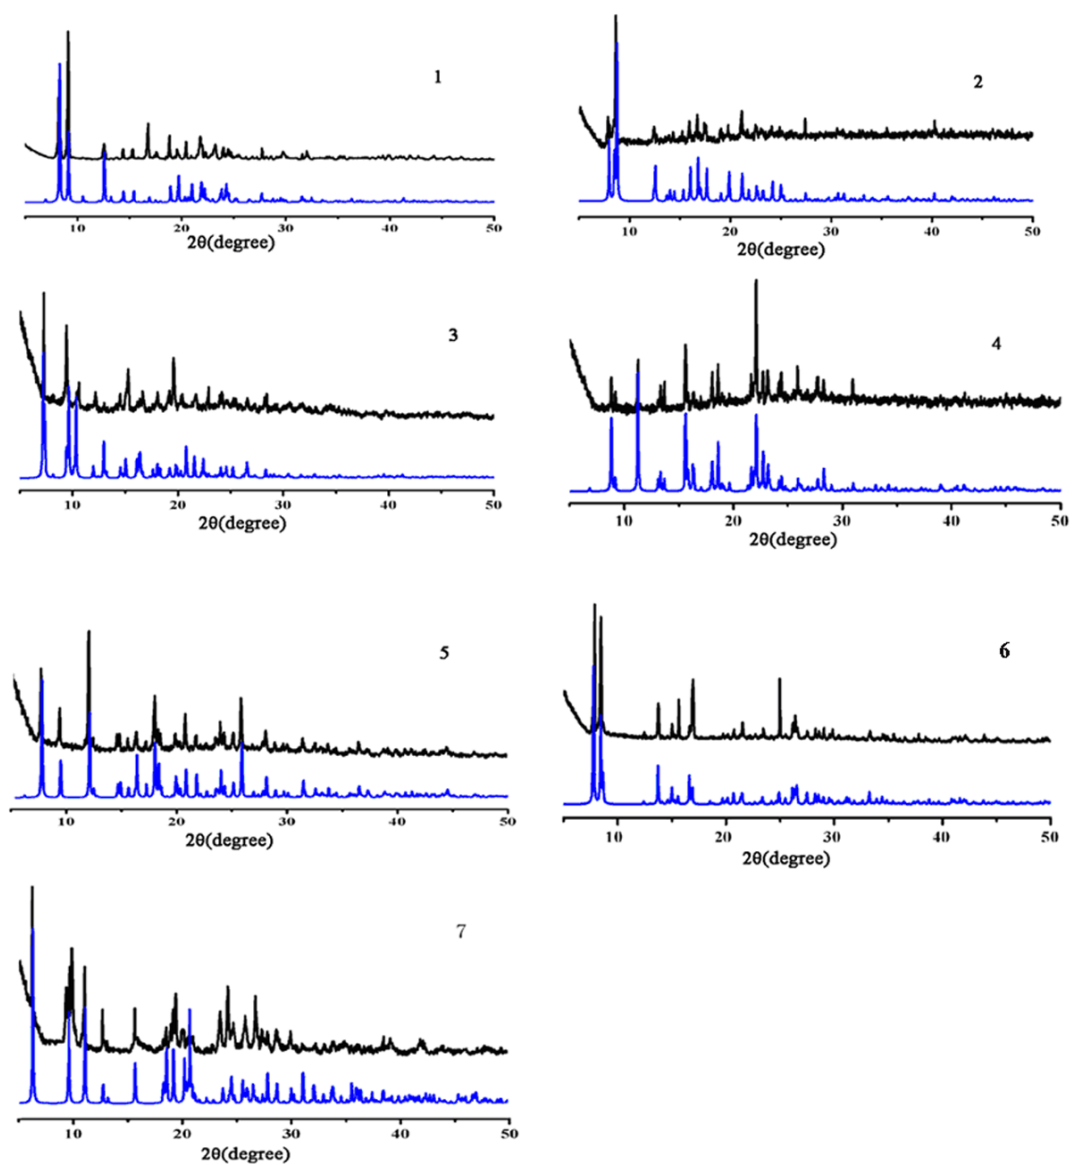

**Fig. S5** The simulated (blue) and experimental (black) PXRD patterns for compounds 1-7.
